# Supplementary material
Source: PubMed Central journal article supplement (PMC4984628)
Supplement: JVI.00441-16_zjv999181830so1.pdf [file JVI.00441-16_zjv999181830so1.pdf]

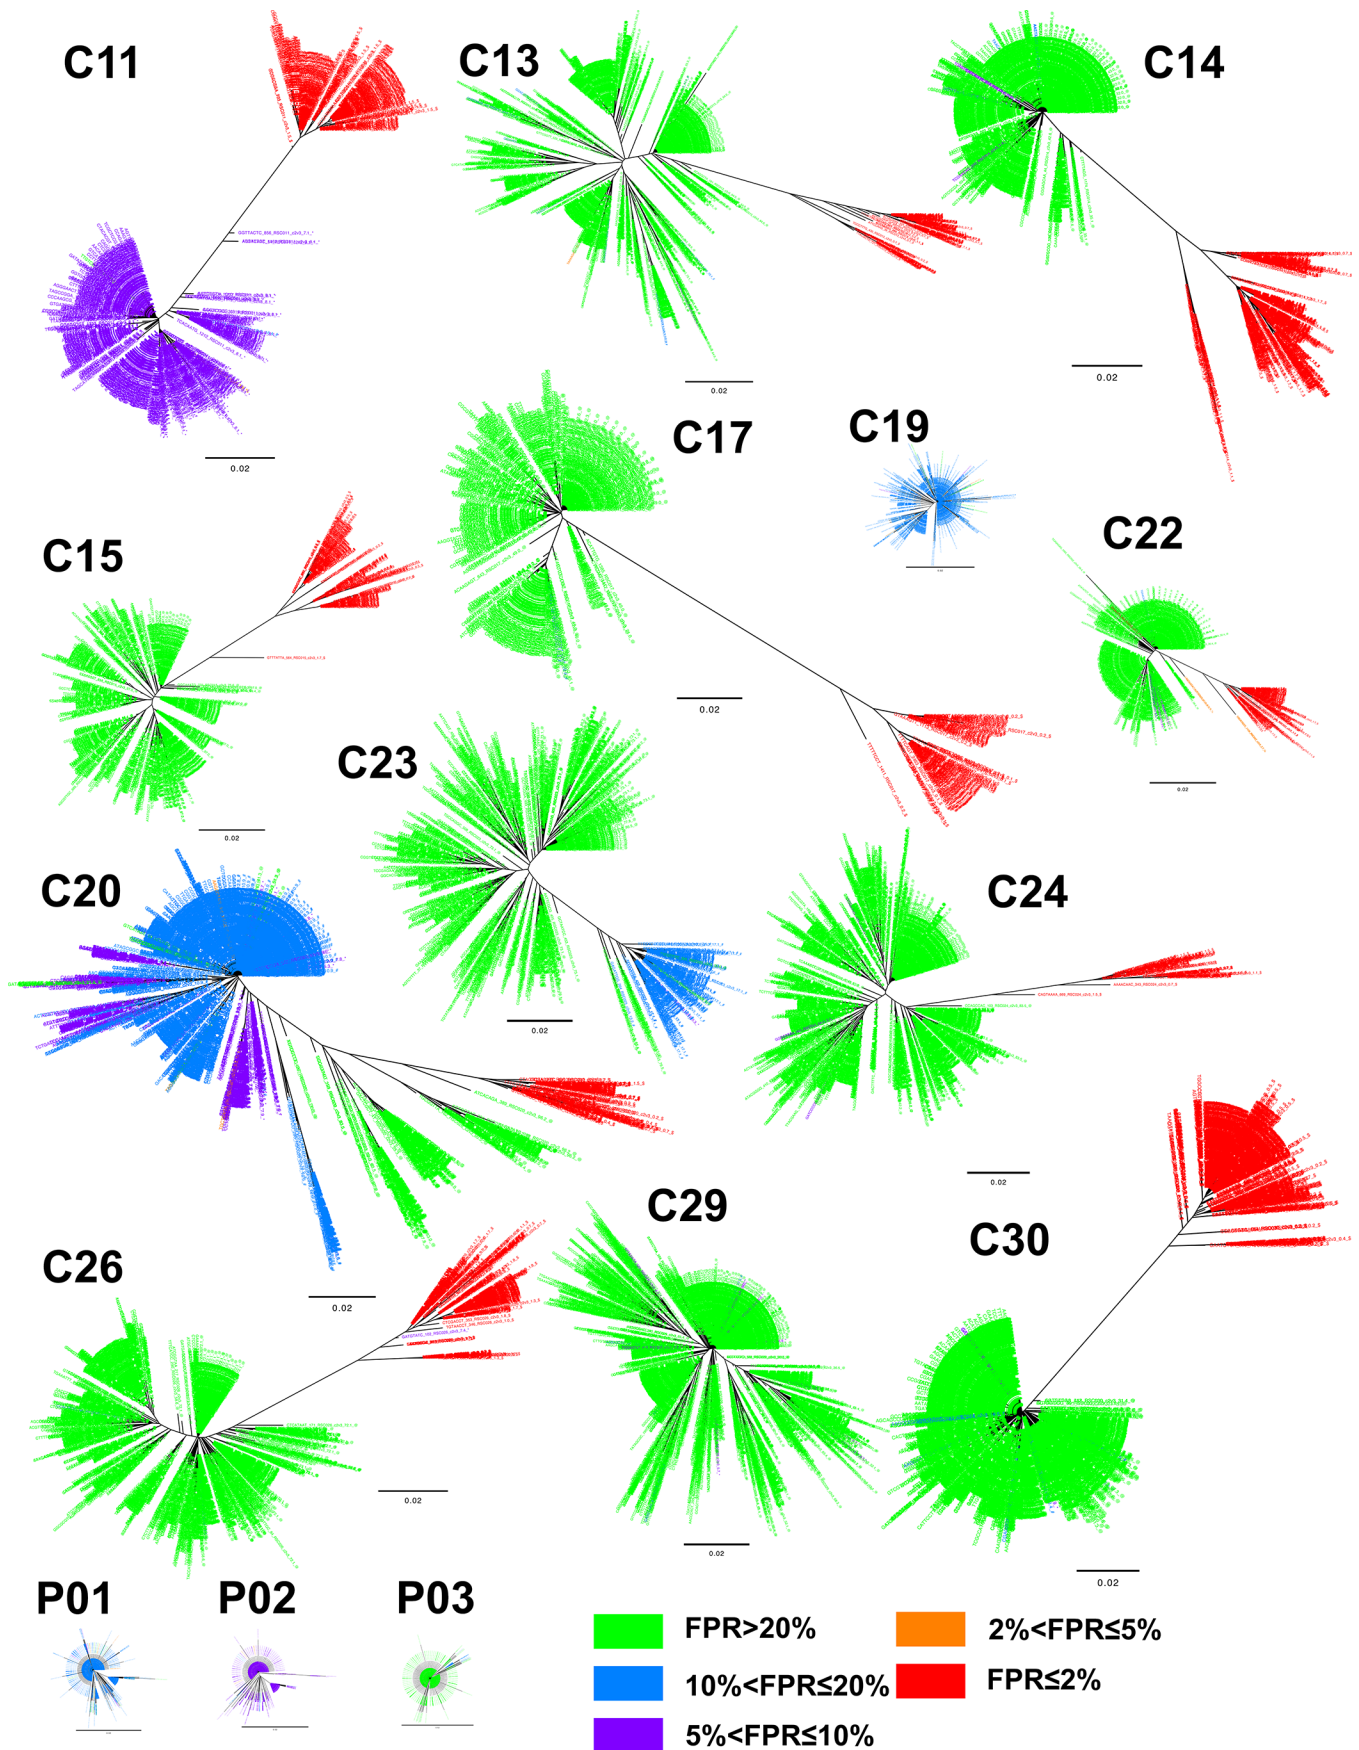

Supplementary Figure 1 Phylogenetic trees of C2/V3 region of study samples showing different level of Geno2pheno<sub>[CORECEPTOR]</sub> false positive rate (FPR) among viral population. Color of taxa names indicates level of FPR: red, FPR ≤ 2%; orange, FPR 2-5%; purple, FPR 5-10%; blue, FPR 10-20%; green, FPR > 20%. The unit of the scale bar of the phylogenetic trees is nucleotide substitutions per site.

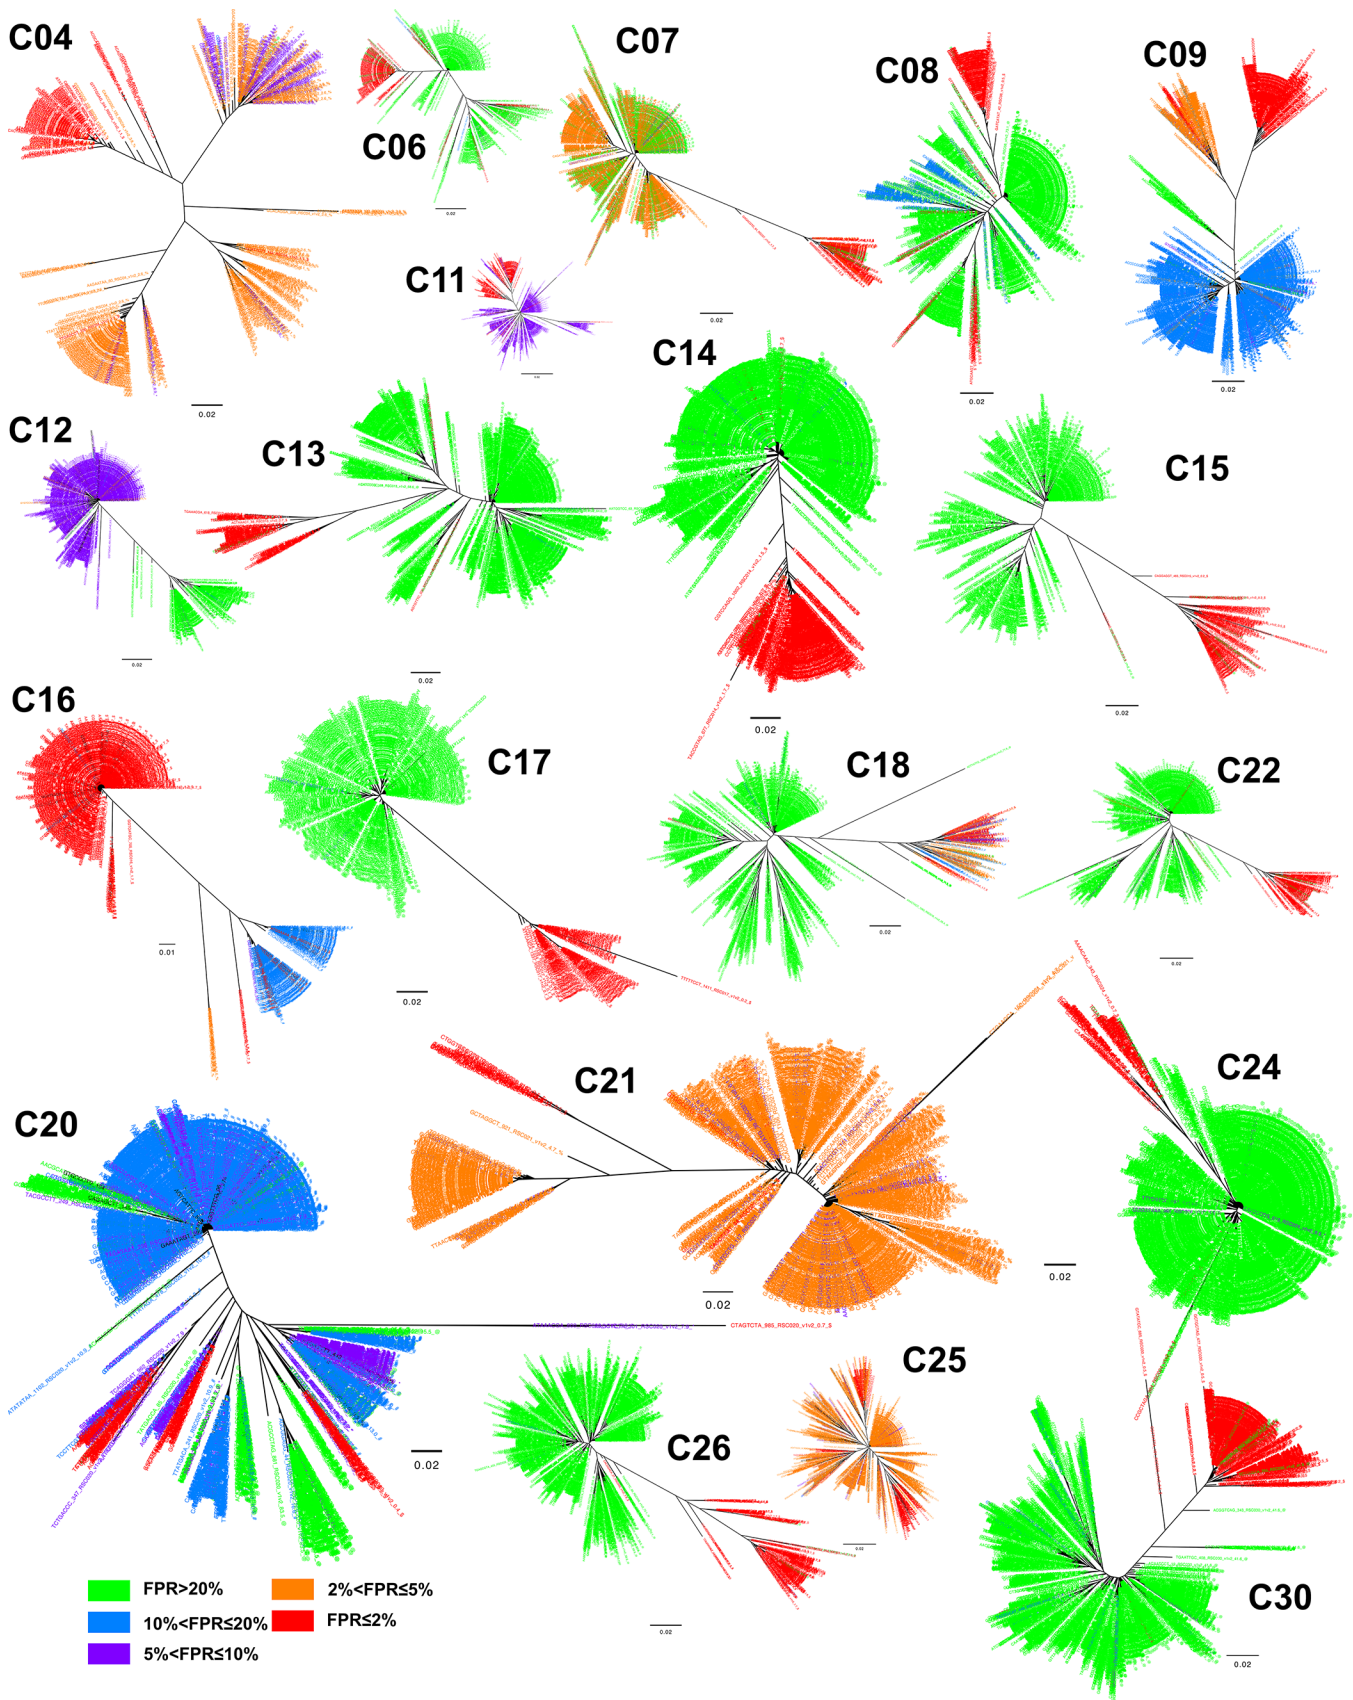

Supplementary Figure 2 Phylogenetic trees of C1/V2 region of study samples with mixed X4/R5 variants, showing different level of  $\text{Geno2pheno}_{[\text{CORECEPTOR}]}$  false positive rate (FPR) among viral population based on the corresponding C2/V3 sequences. Color of taxa names indicates level of FPR: red,  $\text{FPR} \leq 2\%$ ; orange,  $2\% < \text{FPR} \leq 5\%$ ; purple,  $5\% < \text{FPR} \leq 10\%$ ; blue,  $10\% < \text{FPR} \leq 20\%$ ; green,  $\text{FPR} > 20\%$ . The unit of the scale bar of the phylogenetic trees is nucleotide substitutions per site.
